# Supplementary material for: The Effect of Glycidyl Azide Polymer Grafted Tetrafunctional Isocyanate on Polytriazole Polyethylene Oxide-Tetrahydrofuran Elastomer and its Propellant Properties
Source: MDPI journal article supplement (doi:10.3390/polym12020278), 2020-01-31
Supplement: s1 [file s1]

## Supporting information

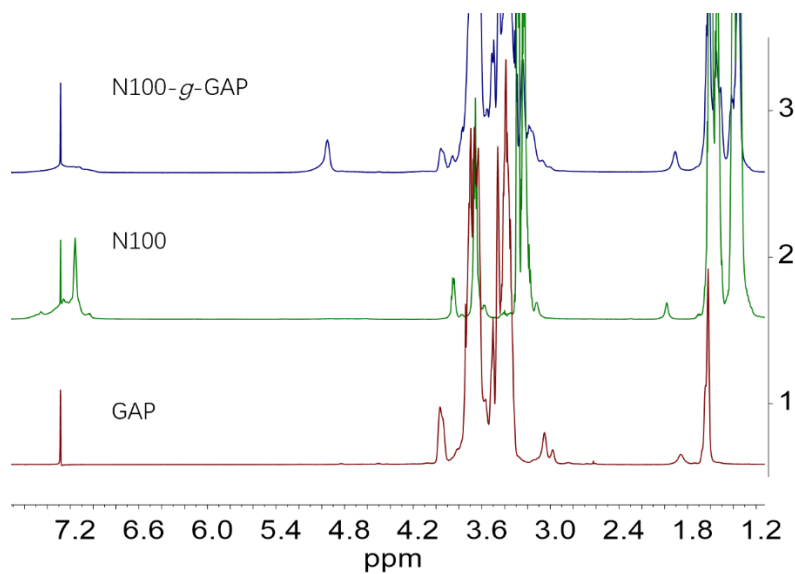

Figure 1.  $^1\text{H}$  NMR analysis of N100-g-GAP, N100, and GAP.

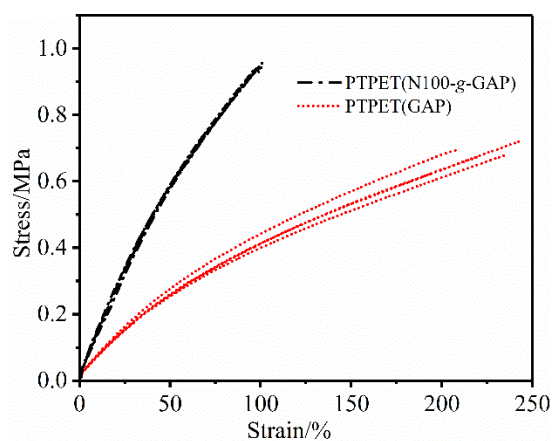

Figure 2. Stress–strain curves of the PTPET elastomer prepared by N100-g-GAP and GAP ( $M_n = 4,000$  g/mol) at 20 °C.

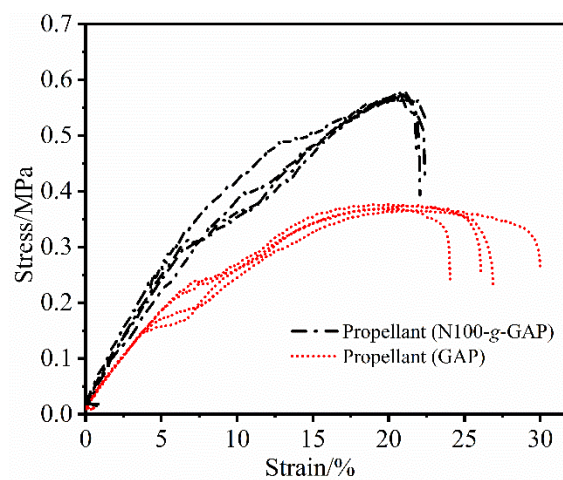

Figure 3. Stress–strain curves of the PTPET propellants prepared by N100-g-GAP and GAP ( $M_n = 4,000$  g/mol) at 20 °C.
